# Supplementary material for: Direct Selective Epitaxy of 2D Sb2Te3 onto Monolayer WS2 for Vertical p–n Heterojunction Photodetectors
Source: MDPI journal article supplement (doi:10.3390/nano14100884), 2024-05-19
Supplement: s1 [file s1]

## Supplementary Information for

### Direct Selective Epitaxy of 2D Sb<sub>2</sub>Te<sub>3</sub> onto Monolayer WS<sub>2</sub> for Vertical p–n Heterojunction Photodetectors

Baojun Pan <sup>1,†</sup>, Zhenjun Dou <sup>2,†</sup>, Mingming Su <sup>1</sup>, Ya Li <sup>1</sup>, Jialing Wu <sup>1</sup>,  
Wanwan Chang <sup>1</sup>, Peijian Wang <sup>2</sup>, Lijie Zhang <sup>2</sup>, Lei Zhao <sup>3,\*</sup>, Mei Zhao <sup>2,\*</sup> and  
Sui-Dong Wang <sup>1</sup>

<sup>1</sup> Macao Institute of Materials Science and Engineering (MIMSE),  
MUST-SUDA Joint Research Center for Advanced Functional Materials,  
Macao University of Science and Technology, Taipa, Macao 999078, China

<sup>2</sup> Key Laboratory of Carbon Materials of Zhejiang Province, Institute of New  
Materials & Industry Technology, College of Chemistry and Materials  
Engineering, Wenzhou University, Wenzhou 325035, China

<sup>3</sup> School of Electronic Engineering, Lanzhou City University, Lanzhou 730070,  
China

\* Correspondence: zhaolei@lzcw.edu.cn (L.Z.); zhaomei@wzu.edu.cn (M.Z.)

<sup>†</sup> These authors contributed equally to this work.

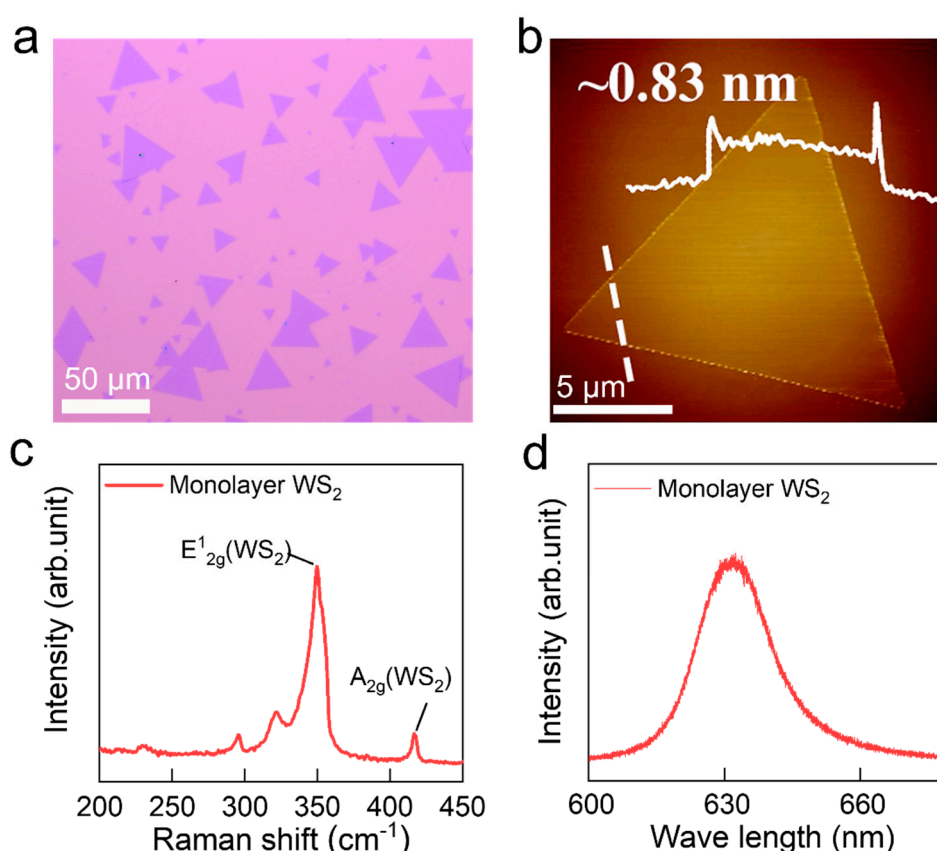

**Figure S1.** (a) The optical image of large-area, uniform monolayer WS<sub>2</sub> flakes. (b) AFM images of the WS<sub>2</sub>. (c) The Raman spectroscopy of the monolayer WS<sub>2</sub> flake. (d) Photoluminescence (PL) spectroscopy of the monolayer WS<sub>2</sub> flake.

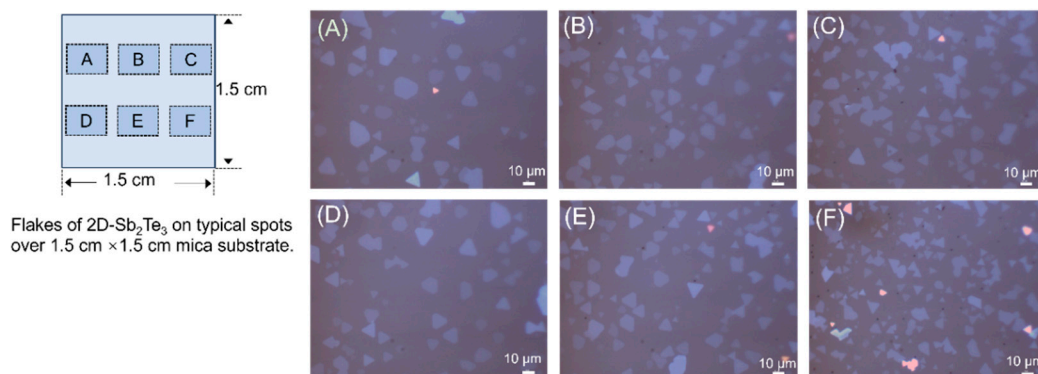

**Figure S2.** Large-area, uniformly distributed two dimension  $\text{Sb}_2\text{Te}_3$  obtained at different spots on the whole  $1.5\text{ cm} \times 1.5\text{ cm}$  mica substrate, corresponding to the schematics in the left side.

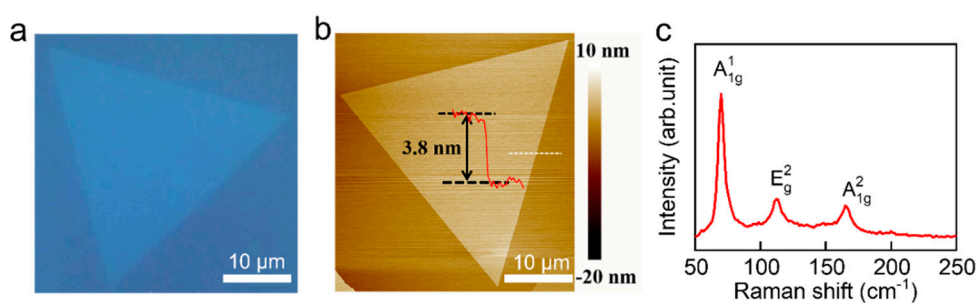

**Figure S3.** AFM and Raman characterizations of two-dimensional  $\text{Sb}_2\text{Te}_3$ . (a) Optical image of two-dimensional  $\text{Sb}_2\text{Te}_3$ . (b) Atomic force microscopy image of two-dimensional  $\text{Sb}_2\text{Te}_3$ . (c) Raman spectrum of two-dimensional  $\text{Sb}_2\text{Te}_3$ .

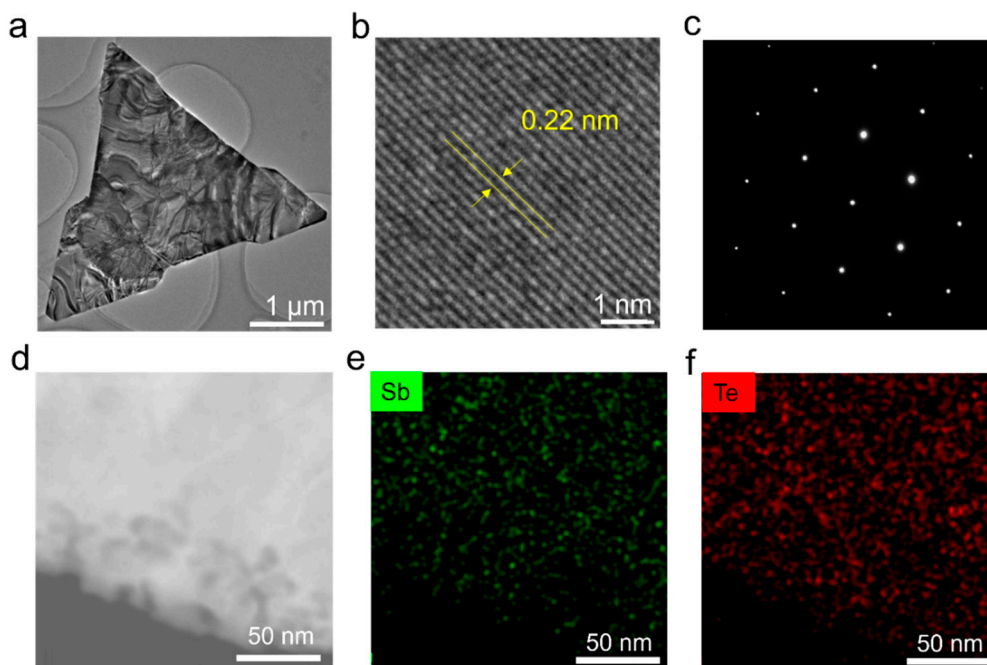

**Figure S4.** Atomic structure of the two dimension  $\text{Sb}_2\text{Te}_3$ . (a) Low-magnification TEM image of two dimension  $\text{Sb}_2\text{Te}_3$ . (b) High-resolution TEM image of the  $\text{Sb}_2\text{Te}_3$ . (c) Electron diffraction pattern taken on the stacked region of the two dimension  $\text{Sb}_2\text{Te}_3$ . (d-f) Collecting EDS mapping of the area and the distribution maps of: Sb and Te, respectively.

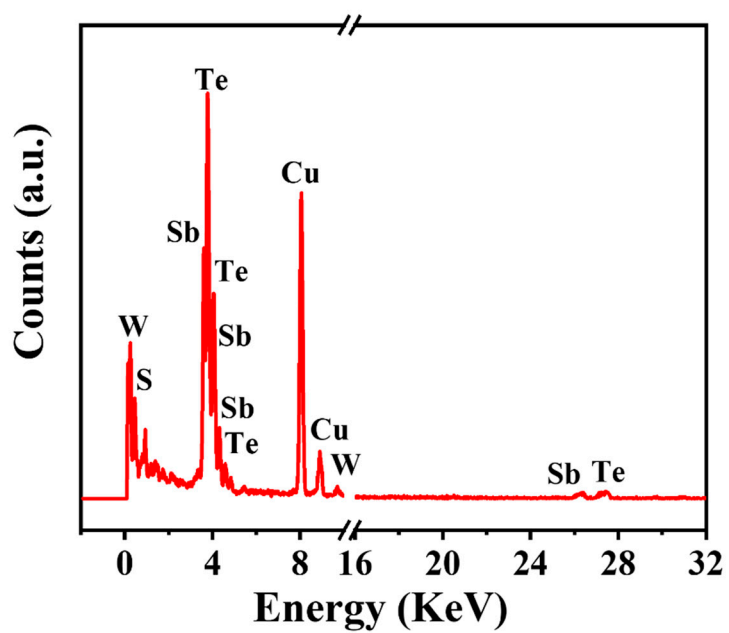

**Figure S5.** Detailed EDS spectrum of  $\text{Sb}_2\text{Te}_3/\text{WS}_2$  heterostructure.

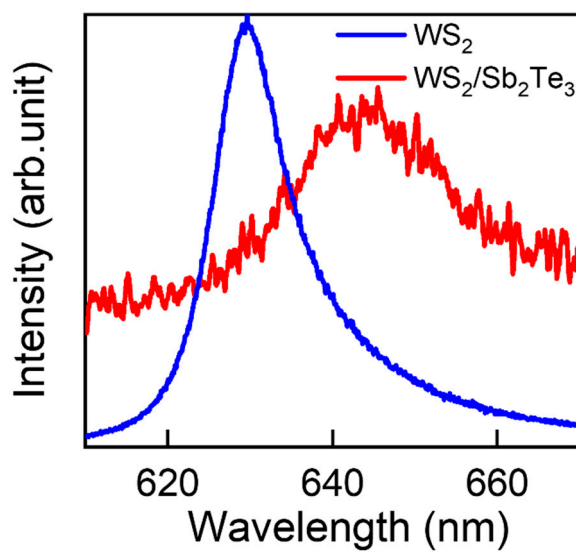

**Figure S6.** Peak intensity normalization performed on the PL spectra shown in Figure 3e.
